# Supplementary material for: Automatized lung disease quantification in patients with COVID-19 as a predictive tool to assess hospitalization severity
Source: PubMed Central journal article supplement (PMC9465374; doi:10.3389/fmed.2022.930055), 2022-08-29
Supplement: Data_Sheet_1.pdf [file Data_Sheet_1.pdf]

Automatized lung disease quantification in COVID-19 patients as a predictive tool to assess hospitalization severity

## Supplementary data

### Clinical and demographic characteristics

For each patient, the following data are available:

- Age (years)
- Gender (0=F, =M)
- Length (cm)
- Weight (kg)
- BMI (kg/m<sup>2</sup>)
- Comorbidities
- Date of first positive PCR
- Admission date (= PCR date unless PCR date is prior to hospital admission date. In this case, Day0 = Hospitalization date).
- Wave of the epidemic of Covid-19 (source = Sciensano, Annex 1)
  - o first wave from March 1 to June 22, 2020 (W1)
  - o inter wave period from June 23, 2020 to Augustus 31, 2020 (Inter W1-W2)
  - o second wave from September 1, 2020 to February 13, 2021 (W2)
  - o third wave started on February 14, 2021 (W3)
- Discharge date (= Discharge date or transfer date to revalidation)
- Length of stay (days)
- Total ICU length of stay (days)
- Number of days between hospital admission and ICU admission
- Symptoms at admission
- Ventilation (1=Yes, 0=No)
- Dialysis (1=Yes, 0=No)
- Issue (0=discharged alive, 1=death)
- CT-scan date
- Number of days between hospital admission and CT scan
- CT severity score: CT severity score for each lobe (0 to 5).
- Total CT severity score = Sum of scores obtained from each lobe = principal outcome (0 to 25). Higher score = higher severity.
- Total lungs volume (mL)
- % Affected area = % of total affected lung parenchyma obtained by sum of each lobe % affected area
- % Emphysema score: % of emphysema of affected area for the whole lung

### Impact of patients' characteristics on CT scans at admission

We studied the relation between the characteristics of the patients and CT-SS or % AA at hospital admission using univariate linear regression models. Univariate linear regression models were used to study the relation between the characteristics of the patients and CT-SS or % AA at hospital admission (Tables 5 and 6).

We observed that older patients had lower % AA ( $p < 0.0001$ ) and CT-SS ( $p = 0.0002$ ) at admission. Obese patients and patients with higher BMI had higher % AA ( $p < 0.0001$ ) and CT-SS ( $p = 0.0001$ ) at admission. Patients with oncological condition were also exhibiting lower

% AA (p=0.0082) and lower CT-SS (p=0.018) at admission. Neither CT-SS at admission nor % AA was related to gender.

Supplementary Table 1. Relation between patients' characteristics and CT-SS at admission (N=476)

| Patient's characteristics   | Coef. $\pm$ SE   | p-value |
|-----------------------------|------------------|---------|
| Age (years)                 | -0.070 $\pm$ 1.3 | 0.0002  |
| Gender (1=Men)              | 0.96 $\pm$ 0.58  | 0.096   |
| BMI (kg/m <sup>2</sup> )    | 0.20 $\pm$ 0.047 | 0.0001  |
| Chronic renal failure       | 0.023 $\pm$ 0.87 | 0.98    |
| Diabetes                    | 0.75 $\pm$ 0.57  | 0.19    |
| Arterial hypertension       | 0.12 $\pm$ 0.59  | 0.83    |
| Cardio-vascular disease     | -1.3 $\pm$ 0.78  | 0.11    |
| Chronic respiratory disease | -0.49 $\pm$ 0.65 | 0.45    |
| Immunosuppressive therapy   | -2.4 $\pm$ 1.3   | 0.056   |
| Obesity                     | 2.3 $\pm$ 0.60   | 0.0001  |
| Oncological condition       | -1.9 $\pm$ 0.81  | 0.018   |

Supplementary Table 2. Relation between patients' characteristics and % AA at admission (N=476)

| Patient's characteristics   | Coef. $\pm$ SE    | p-value |
|-----------------------------|-------------------|---------|
| Age (years)                 | -0.29 $\pm$ 0.069 | <0.0001 |
| Gender (1=Men)              | 3.4 $\pm$ 2.1     | 0.11    |
| BMI (kg/m <sup>2</sup> )    | 0.79 $\pm$ 0.17   | <0.0001 |
| Chronic renal failure       | -0.71 $\pm$ 3.3   | 0.83    |
| Diabetes                    | 3.1 $\pm$ 2.1     | 0.14    |
| Arterial hypertension       | 0.57 $\pm$ 2.2    | 0.80    |
| Cardio-vascular disease     | -4.5 $\pm$ 3.1    | 0.15    |
| Chronic respiratory disease | -1.2 $\pm$ 2.4    | 0.63    |
| Immunosuppressive therapy   | -7.0 $\pm$ 4.9    | 0.15    |
| Obesity                     | 9.4 $\pm$ 2.2     | <0.0001 |
| Oncological condition       | -8.0 $\pm$ 3.0    | 0.0082  |

Supplementary Table 3. Relation between patient's characteristics and hospitalization severity indicators (Multiple linear regression model on log-transformed (ICU) or hospital LOS or multiple logistic regression model; models are adjusted for age, gender, BMI, and wave ; N = 410). LOS: length of stay.

|                                | Hospital LOS  |                | ICU admission risk |                    | ICU LOS           |               | Mechanical ventilation risk |                   | In-hospital death risk |                     |
|--------------------------------|---------------|----------------|--------------------|--------------------|-------------------|---------------|-----------------------------|-------------------|------------------------|---------------------|
|                                | p value       | Coef. ± SE     | p value            | OR [95%CI]         | p value           | Coef. ± SE    | p value                     | OR [95%CI]        | p value                | OR [95%CI]          |
| <b>Intercept</b>               |               | 1.7 ± 0.32     |                    |                    |                   | 1.2 ± 0.54    |                             |                   |                        |                     |
| <b>Age (by decades)</b>        | 0.25          | 0.034 ± 0.030  | <b>0.0008</b>      | 0.74 [0.62 ; 0.88] | 0.23              | 0.063 ± 0.052 | 0.68                        | 0.97 [0.81 ; 1.1] | <b>&lt;0.0001</b>      | 1.7 [1.4 ; 2.1]     |
| <b>Gender (Ref=Woman)</b>      | 0.90          | 0.010 ± 0.087  | 0.092              | 1.6 [0.93 ; 2.7]   | 0.82              | -0.032 ± 0.14 | 0.33                        | 1.3 [0.78 ; 2.1]  | 0.13                   | 1.5 [0.89 ; 2.4]    |
| <b>BMI (kg/m<sup>2</sup>)</b>  | <b>0.045</b>  | 0.014 ± 0.007  | <b>0.023</b>       | 1.0 [1.001 ; 1.1]  | <b>0.011</b>      | 0.029 ± 0.011 | <b>0.016</b>                | 1.1 [1.01 ; 1.1]  | 0.055                  | 0.96 [0.92 ; 1.001] |
| <b>Wave (Ref=W1)</b>           | <b>0.040</b>  | -0.17 ± 0.083  | <b>&lt;0.0001</b>  | 3.4 [2.1 ; 5.7]    | <b>&lt;0.0001</b> | -0.65 ± 0.14  | 0.24                        | 0.75 [0.47 ; 1.2] | 0.59                   | 1.1 [0.72 ; 1.8]    |
| <b>Total CT severity score</b> | <b>0.0004</b> | 0.025 ± 0.0071 | <b>&lt;0.0001</b>  | 1.3 [1.2 ; 1.3]    | 0.16              | 0.017 ± 0.012 | <b>&lt;0.0001</b>           | 1.2 [1.1 ; 1.2]   | <b>0.040</b>           | 1.0 [1.002 ; 1.1]   |

Supplementary Table 4. Disease extension measured for each individual lobe.

|                          | N non-missing | Mean ± SD | Median (p25-p75) | Extremes |
|--------------------------|---------------|-----------|------------------|----------|
| <b>CT severity score</b> |               |           |                  |          |
| Left upper lobe          | 476           | 1.9 ± 1.4 | 2 (1 – 3)        | 0 ; 5    |
| Left lower lobe          | 476           | 2.7 ± 1.4 | 3 (2 – 4)        | 0 ; 5    |
| Right upper lobe         | 476           | 2.1 ± 1.4 | 2 (1 – 3)        | 0 ; 5    |

|                          |     |             |                    |             |
|--------------------------|-----|-------------|--------------------|-------------|
| Right lower lobe         | 476 | 2.8 ± 1.4   | 3 (2 – 4)          | 0 ; 5       |
| Right middle lobe        | 476 | 1.8 ± 1.3   | 2 (1 – 3)          | 0 ; 5       |
| Whole lung               | 476 | 11.4 ± 6.0  | 11 (7 – 16)        | 0 ; 25      |
| <b>Affected area (%)</b> |     |             |                    |             |
| Left upper lobe          | 476 | 20.6 ± 23.0 | 11.2 (1.3 ; 34.9)  | 0.00 ; 86.3 |
| Left lower lobe          | 476 | 35.0 ± 28.8 | 61.5 (28.3 – 61.5) | 0.00 ; 89.8 |
| Right upper lobe         | 476 | 23.0 ± 24.2 | 14.2 (1.7 – 39.6)  | 0.00 ; 93.0 |
| Right lower lobe         | 476 | 35.9 ± 27.6 | 31.6 (9.7 – 61.1)  | 0.00 ; 92.4 |
| Right middle lobe        | 476 | 18.8 ± 23.1 | 7.5 (1.1 – 29.8)   | 0.00 ; 94.5 |
| Whole lung               | 476 | 26.1 ± 22.4 | 19.0 (6.3 – 42.2)  | 0.00 ; 84.1 |

Supplementary Table 5. Association of CT scan analysis the with the patient outcomes for left and right lower lobes, compared to the whole lung.

|                                 | Length of stay * |         | Risk of ICU admission § |         | ICU length of stay * |         | Risk of mechanical ventilation § |         | Risk of in-hospital death § |         |
|---------------------------------|------------------|---------|-------------------------|---------|----------------------|---------|----------------------------------|---------|-----------------------------|---------|
|                                 | Coef ± SE        | p-value | OR (95% CI)             | p-value | Coef ± SE            | p-value | OR (95% CI)                      | p-value | OR (95% CI)                 | p-value |
| <b>CT-SS (Entire lung)</b>      | 0.025 ± 0.0071   | 0.0004  | 1.3 [1.2 ; 1.3]         | <0.0001 | 0.017 ± 0.012        | 0.16    | 1.2 [1.1 ; 1.2]                  | <0.0001 | 1.0 [1.002 ; 1.1]           | 0.040   |
| <b>% AA (Entire lung)</b>       | 0.0060 ± 0.0019  | 0.0018  | 1.1 [1.1 ; 1.1]         | <0.0001 | 0.0036 ± 0.0029      | 0.22    | 1.0 [1.03 ; 1.05]                | <0.0001 | 1.0 [1.002 ; 1.02]          | 0.023   |
|                                 |                  |         |                         |         |                      |         |                                  |         |                             |         |
| <b>CT-SS (Left lower lobe)</b>  | 0.086 ± 0.030    | 0.0040  | 2.1 [1.8 ; 2.6]         | <0.0001 | 0.055 ± 0.049        | 0.25    | 1.7 [1.4 ; 2.0]                  | <0.0001 | 1.1 [0.98 ; 1.4]            | 0.085   |
| <b>% AA (Left lower lobe)</b>   | 0.0042 ± 0.0015  | 0.0044  | 1.0 [1.03 ; 1.05]       | <0.0001 | 0.0022 ± 0.0023      | 0.34    | 1.0 [1.02 ; 10.3]                | <0.0001 | 1.0 [1.00 ; 1.02]           | 0.062   |
|                                 |                  |         |                         |         |                      |         |                                  |         |                             |         |
| <b>% AA (Righth lower lobe)</b> | 0.0052 ± 0.0015  | 0.0006  | 1.0 [1.03 ; 1.05]       | <0.0001 | 0.0030 ± 0.0024      | 0.21    | 1.0 [1.02 ; 1.03]                | <0.0001 | 1.0 [1.00 ; 1.02]           | 0.044   |

\* Multiple linear regression models on log-transformed length of stay, § Multiple logistic regression models. All multiple models were adjusted for age, gender, BMI, and wave.
